# Supplementary material for: Characterization of ozone production in San Antonio, Texas, using measurements of total peroxy radicals
Source: Copernicus journal article supplement (doi:10.5194/acp-19-2845-2019), 2019-03-04
Supplement: Supplementary file 1 [file acp-19-2845-2019-supplement.pdf]

Supplement of Atmos. Chem. Phys., 19, 2845–2860, 2019  
<https://doi.org/10.5194/acp-19-2845-2019-supplement>  
© Author(s) 2019. This work is distributed under  
the Creative Commons Attribution 4.0 License.

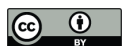

*Supplement of*

## **Characterization of ozone production in San Antonio, Texas, using measurements of total peroxy radicals**

**Daniel C. Anderson et al.**

*Correspondence to:* Daniel C. Anderson (dca54@drexel.edu)

The copyright of individual parts of the supplement might differ from the CC BY 4.0 License.

## Supplementary Information

### S1. ECHAMP Inlet Description

A schematic of the ECHAMP inlet used during SAFS is shown in Fig. S1. As described in the main text, the inlet was mounted approximately 15 m above ground level. Solenoid valves were located inside the AML, and gases were transported to the inlet through 22.8 m of 3.2 mm (1/8") OD FEP tubing for NO and copper tubing for N<sub>2</sub> and C<sub>2</sub>H<sub>6</sub>. At any given point in time, one reaction chamber was in amplification mode (C<sub>2</sub>H<sub>6</sub> added upstream, N<sub>2</sub> added downstream) and the other was in background mode (N<sub>2</sub> added upstream, and C<sub>2</sub>H<sub>6</sub> added downstream). This inlet differs from that described in Wood et al. (2017) in that a RO<sub>x</sub> calibration system based on water vapor photolysis (described in Sect. S2.1) was permanently connected to the inlet, so that calibrations could be performed without disturbing sampling from the other instruments. During calibrations, zero air was delivered by 22.8 m of 9.5 mm (3/8") OD FEP tubing to a 12.7 mm (0.5") OD quartz tube inside the inlet box

### S2. XO<sub>2</sub> Calibrations

Total peroxy radicals were calibrated using two methods: photolysis of H<sub>2</sub>O followed by reaction with either H<sub>2</sub> or C<sub>2</sub>H<sub>6</sub> and photolysis of CH<sub>3</sub>I. We describe both methods here.

#### S2.1. H<sub>2</sub>O calibration

Calibration of XO<sub>2</sub> was performed via water vapor photolysis at 184.9 nm from a mercury lamp, which produces an equimolar mixture of OH and HO<sub>2</sub>, according to Reaction (RS1) (Schultz et al., 1995; Lanzendorf et al., 1997). The OH was then reacted with H<sub>2</sub> (g) which was added to the zero air flow upstream of the UV illumination to quantitatively convert OH into HO<sub>2</sub> (Reaction RS2).

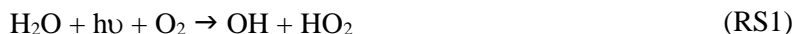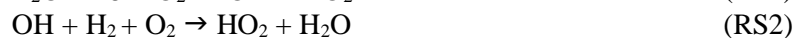

Total XO<sub>2</sub> can then be calculated from Eq. (S1), where brackets denote concentration,  $\sigma$  and  $\phi$  are the absorption cross sections and photolysis quantum yields at 185 nm for the indicated species, respectively. For  $\sigma_{\text{H}_2\text{O}}$  we use  $7.1 \times 10^{-20} \text{ cm}^2 \text{ molecule}^{-1}$  (Cantrell et al., 1997). The effective O<sub>2</sub> absorption cross section depends on both the UV lamp operating conditions and the O<sub>2</sub> column density

27 and therefore must be characterized for each lamp (Lanzendorf et al., 1997;Creasey et al., 2000). The Hg  
28 lamp used in this study was characterized at the University of Indiana courtesy of Phil Stevens and found  
29 to have an effective cross section of  $1.3 \times 10^{-20} \text{ cm}^2 \text{ molecule}^{-1}$  at an  $\text{O}_2$  column density of  $5 \times 10^{18}$   
30 molecules  $\text{cm}^{-3}$ , within the range of values seen in other studies (Lanzendorf et al., 1997;Creasey et al.,  
31 2000). Quantification of the ozone formed by photolysis of  $\text{O}_2$  at the same wavelength (184.9 nm) serves  
32 as the “chemical actinometer” (Schultz et al., 1995).

$$[\text{HO}_2] + [\text{RO}_2] = \frac{[\text{O}_3][\text{H}_2\text{O}]\sigma_{\text{H}_2\text{O}}\phi_{\text{H}_2\text{O}}}{[\text{O}_2]\sigma_{\text{O}_2}\phi_{\text{O}_2}} \quad (\text{S1})$$

33

34 The typical calibration procedure is as follows:

- 35 1. 8 to 10 LPM of dry zero air (ZA) flow sequentially through 22.8 m of 9.5 mm (3/8”) OD FEP  
36 tubing, an 18 cm long 12.7 mm (0.5”) quartz tube in the ECHAMP inlet box, and into the  
37 sampling manifold (see Fig. S1). Both reaction chambers are operated in background mode, with  
38 NO and  $\text{N}_2$  added upstream of the reaction chambers and ethane added downstream. The  $\text{NO}_2$   
39 concentration measured by the CAPS sensors for this step is solely from impurities in the NO  
40 flow and  $\text{NO}_2$  formed by the termolecular reaction between NO and  $\text{O}_2$ .
- 41 2. A mercury lamp (Jelight 78-2046-2) mounted onto the outside of the quartz tube is then turned  
42 on, providing UV radiation at 184.9 nm and resulting in the production of  $\text{O}_3$  in the ZA flow but  
43 no  $\text{HO}_x$  given the absence of  $\text{H}_2\text{O}_{(\text{g})}$ . A nitrogen purge was placed between the lamp and the  
44 quartz tubing to prevent ozone formation outside of the sampling system. Only a small portion of  
45 the quartz tubing (~1 cm) is exposed to the lamp to control the eventual  $\text{HO}_x$  and  $\text{O}_3$   
46 concentrations. The ozone reacts with the excess NO to produce  $\text{NO}_2$ . The ozone concentration  
47 for Eq. (S1) is thus given by the difference in measured  $[\text{NO}_2]$  between steps 1 and 2 of the  
48 calibration, with a 10% correction applied to account for the dilution by the added flows of NO,  
49  $\text{N}_2$ , and  $\text{C}_2\text{H}_6$ . Typical  $\text{O}_3$  concentrations for calibration were between 0.5 and 2 ppbv, which is

50 easily measured with the CAPS sensors given their typical NO<sub>2</sub> precision of 20 pptv with 10-  
51 second averaging.

52 3. A portion of the ZA is then sent through a bubbler system with distilled water to humidify the ZA  
53 flow. The H<sub>2</sub>O concentration for Eq. (S1) is calculated using the RH and temperature reading  
54 from the Vaisala probe and the ambient pressure.

55 4. H<sub>2</sub> gas was then added to the mixture at a flow rate of 30 sccm. ECHAMP was then operated in  
56 normal sampling mode, with the two reaction chambers alternating between amplification and  
57 background modes every 60 s.

58 The amplification factor, F, is then determined from the ratio of the observed change in NO<sub>2</sub> signal  
59 during step 4 (amplification mode) to the XO<sub>2</sub> concentration calculated from Eq. (S1).

## 60 61 ***S2.2. CH<sub>3</sub>I calibration***

62 The CH<sub>3</sub>I photolysis method, similar to the acetone photolysis method described in Wood and  
63 Charest (2014) except that methyl iodide is used in place of acetone, produces methyl peroxy radicals  
64 (CH<sub>3</sub>O<sub>2</sub>) by the UV photolysis of CH<sub>3</sub>I(g):

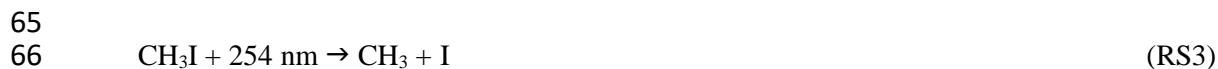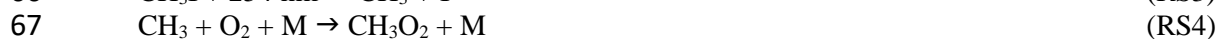

68  
69 In both cases, the peroxy radical concentration is quantified simply by the increase in NO<sub>2</sub> following  
70 reaction of the peroxy radicals with excess NO. The concentration quantification does not rely on  
71 spectroscopic parameters or direct actinometry of the UV source, but instead on the accuracy of the NO<sub>2</sub>  
72 measurements by the CAPS, which we trace to the absorption cross section of O<sub>3</sub> at 254 nm, and the  
73 relative rate constants for reactions.

74 The source of CH<sub>3</sub>I is a permeation tube (KynTek, 1.8 μg/min permeation rate at 35° C), held at  
75 55° C. We flow approximately 100 sccm of N<sub>2</sub> through the permeation tube and dilute this into a larger  
76 flow of 8 LPM of either dry or humidified ultra zero air, resulting in an estimated CH<sub>3</sub>I mixing ratio of 80  
77 ppbv based on the manufacturer-stated permeation rate and assuming the permeation rate is twice as high

78 at 55° C. This diluted CH<sub>3</sub>I then enters a Pyrex photolysis chamber (volume 50 cm<sup>3</sup>) into which an “O<sub>3</sub>-  
79 free” mercury lamp is inserted (Jelight model 81-3306-2, all 185 nm radiation blocked).

80 When these CH<sub>3</sub>O<sub>2</sub> radicals enter the reaction chamber that is in “background” mode, i.e., with  
81 the C<sub>2</sub>H<sub>6</sub> added downstream of the NO addition, allowing time for all sampled RO<sub>x</sub> to be converted to  
82 HONO, the following reactions occur:

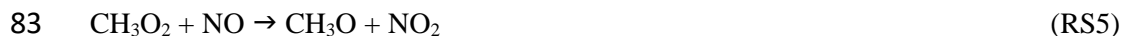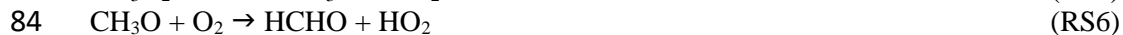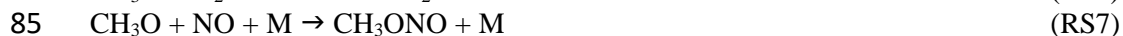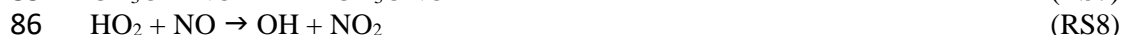

87

88 Thus by modulating the CH<sub>3</sub>O<sub>2</sub> source and observing the change in NO<sub>2</sub>, the concentration of CH<sub>3</sub>O<sub>2</sub> can  
89 be calculated based on the overall stoichiometry of Reactions (RS5) through (RS8). Modulating the NO  
90 flow on and off instead of the CH<sub>3</sub>O<sub>2</sub> source would be inferior because it would also remove the NO<sub>2</sub>  
91 already present in the NO flow due to impurities and the termolecular reaction between NO and O<sub>2</sub>. The  
92 CH<sub>3</sub>O<sub>2</sub> flow can be modulated in three ways: 1. Periodically diverting the CH<sub>3</sub>I flow from the perm tube  
93 away from the air dilution flow (but with the zero air still illuminated by the UV lamp), 2. Turning the  
94 UV source on and off, or 3. Periodically having the diluted CH<sub>3</sub>I + zero air flow bypass the UV chamber  
95 and proceed to the ECHAMP inlet.

96 Method 1 is similar to the acetone photolysis method described by Wood and Charest (2014) with the  
97 weakness that it will also remove any interfering species present in the permeation tube output that absorb  
98 blue light, e.g., I<sub>2</sub> or I<sub>3</sub><sup>-</sup> compounds. The advantage of methods 2 and 3 are that any blue-absorbing species  
99 present in the gas mixture will always be present and thus not present an interference. This is important  
100 when using the CAPS monitor to quantify NO<sub>2</sub>, since it measures the total cell absorption at 450 nm  
101 (FWHM 10 nm) and thus is not completely spectroscopically selective to NO<sub>2</sub>. Method 2 suffers from the  
102 time required for the Hg lamp to warm-up. Method 3 is thus our primary method, though we periodically  
103 use methods 1 and 2 as a check. A schematic of the calibration setup is shown in Fig. S6.

104 There are two main parts to the calibration procedure:

105 1. CH<sub>3</sub>I flows through the UV chamber, producing CH<sub>3</sub>O<sub>2</sub> radicals, and the two channels  
106 of ECHAMP are operated in its standard operation mode, each channel alternating  
107 between amplification mode and background mode.

108 2. Both channels are kept in background mode, and the CH<sub>3</sub>O<sub>2</sub> source is modulated as  
109 described above by periodically having the diluted CH<sub>3</sub>I flow bypass the photolysis  
110 chamber.

111  
112 The amplification factor is given by Eq. (S2):

$$113 \quad F = \Delta\text{NO}_2(\text{step1}) / [\text{CH}_3\text{O}_2] \quad (\text{S2})$$

114  
115  
116  $\Delta\text{NO}_2(\text{step1})$  is the difference in [NO<sub>2</sub>] observed by ECHAMP during step 1 of the calibration procedure  
117 and [CH<sub>3</sub>O<sub>2</sub>] is determined by the following equation:

$$118 \quad [\text{CH}_3\text{O}_2] = \Delta\text{NO}_2(\text{step2}) / (1.86 \times 0.92) \quad (\text{S3})$$

119  
120  $\Delta\text{NO}_2(\text{step2})$  is the change in [NO<sub>2</sub>] observed when the CH<sub>3</sub>O<sub>2</sub> source is modulated during step 2. The  
121 factor of 1.86 accounts for the portion of the CH<sub>3</sub>O<sub>2</sub> radicals that form CH<sub>3</sub>ONO upon reaction with  
122 excess NO rather than two NO<sub>2</sub> molecules. This is calculated by Eq. (S4):

$$123 \quad FF = 2 \left\{ \frac{k_{\text{RS6}}[\text{O}_2]}{k_{\text{RS6}}[\text{O}_2] + k_{\text{RS7}}[\text{NO}]} \right\} \quad (\text{S4})$$

124  
125  
126 Where  $k_{\text{RS6}}$  ( $1.9 \times 10^{-15} \text{ cm}^3 \text{ molecule}^{-1} \text{ s}^{-1}$ ) and  $k_{\text{RS7}}$  ( $3.3 \times 10^{-11} \text{ cm}^3 \text{ molecule}^{-1} \text{ s}^{-1}$ ) are the rate constants  
127 for Reactions (RS6) and (RS7), respectively (Atkinson et al., 2006). The factor of 0.92 in Eq. (S2)  
128 accounts for the dilution of the gas by the added N<sub>2</sub>, C<sub>2</sub>H<sub>6</sub>/N<sub>2</sub>, and NO/N<sub>2</sub>.

129 In contrast to the H<sub>2</sub>O photolysis method, this CH<sub>3</sub>I method is an “internal” calibration, i.e. the  
130 concentration determined is the amount that entered the reaction chamber - it does not account for losses  
131 of radicals in the sampling system. Separate wall loss measurements have demonstrated that losses of  
132 CH<sub>3</sub>O<sub>2</sub> in our sampling inlet are negligible (less than 1%) and losses of HO<sub>2</sub> less than 3%. Sampling  
133 losses of CH<sub>3</sub>O<sub>2</sub> and other peroxy radicals, especially HO<sub>2</sub>, will be described in more detail in a future  
134 publication (Anderson et al, in preparation).

135 An example time series of CH<sub>3</sub>I calibration data is shown in Fig. S7 from 31 May 2017. From 10:30  
136 to 10:34 ECHAMP was operating in regular sampling mode (alternating amplification-background  
137 mode), sampling CH<sub>3</sub>O<sub>2</sub> radicals from the CH<sub>3</sub>I photolysis system at 23% RH, with a modulated NO<sub>2</sub>  
138 signal of 4.14 ppbv. From 10:34 to 10:40, the diluted CH<sub>3</sub>I periodically bypassed the UV chamber,  
139 producing a modulated NO<sub>2</sub> signal of 0.37 ppbv. This results in an amplification factor of 19.1. During  
140 field calibrations we typically measure multiple single-point calibrations over a range of RH values. To  
141 confirm instrument linearity we occasionally execute multi-point calibrations over a range of  
142 concentrations at a single RH value. The uncertainty of this calibration method depends on the short-term  
143 precision and baseline drift of the CAPS monitors, the CAPS NO<sub>2</sub> calibration, the uncertainty in the NO  
144 and O<sub>2</sub> mixing ratios, and the rate constants for RS5, RS6, and RS7. For the calibration concentrations  
145 used during SAFS, the 2 sigma uncertainty of this method was 20%.

146 We have also investigated potential interferences due to I<sub>2</sub> formation. I<sub>2</sub> can also be formed following  
147 photolysis of CH<sub>3</sub>I through the following mechanisms as described by Clemitshaw et al (1997):

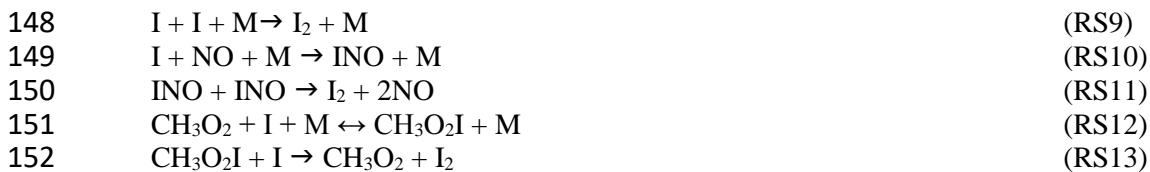

153  
154 The maximum amount of I<sub>2</sub> that could be formed, based on Reactions (RS9), (RS11), and (RS13), is  
155 equal to [CH<sub>3</sub>O<sub>2</sub>]/2. At this amount, I<sub>2</sub> would be an interference as it absorbs blue light and would be  
156 detected as NO<sub>2</sub> by the CAPS sensor (I<sub>2</sub> absorption cross section at 450 nm is ~75% that of NO<sub>2</sub>).

157 To determine experimentally whether there is any observable interference from I<sub>2</sub> formation, we  
158 determined the CH<sub>3</sub>O<sub>2</sub> concentration as described in step 2 of the calibration procedure above. Then, we  
159 turned off the NO flow, effectively stopping amplification. Leaving the lamp on, we then periodically  
160 switched between flowing the CH<sub>3</sub>I through the photolysis chamber and then bypassing photolysis. The  
161 difference in observed signal between these two settings would therefore stem from absorption of blue  
162 light from I<sub>2</sub>. For a flow rate that produced 100 pptv of CH<sub>3</sub>O<sub>2</sub>, concentrations typically used for  
163 calibrating, the I<sub>2</sub> signal, if any, was indistinguishable from the instrument noise, suggesting that at this

164 concentration, there is negligible interference from I<sub>2</sub> in our calibration. For a flow rate that produced a  
165 CH<sub>3</sub>O<sub>2</sub> concentration of 450 pptv, significantly larger than what is used for calibrations, the CAPS  
166 produced an “equivalent” NO<sub>2</sub> signal of ~100 pptv, which would lead to an overestimate in the CH<sub>3</sub>O<sub>2</sub>  
167 concentration of 22%.

168 A simple computer numerical integration, using the above described reactions, was also used to  
169 calculate the variation in INO, I<sub>2</sub>, and CH<sub>3</sub>O<sub>2</sub>I with time. Literature values were used for all rate constants  
170 except for reactions S12 and S13, for which literature values could not be found. Four simulations were  
171 conducted. In the first two, the rate constant for Reaction (RS12) (forward) was estimated as  $1 \times 10^{-11}$   
172 cm<sup>3</sup> molecules<sup>-1</sup> s<sup>-1</sup>, and the rate constant for the reverse (RS12) reaction, k was assumed to be 0. The  
173 initial concentrations of I and CH<sub>3</sub>O<sub>2</sub> were 100 pptv in the first simulation and 1000 pptv in the second.  
174 In the third and fourth simulations, these initial concentrations were kept the same, while the reaction  
175 rates for S12 was increased to  $1 \times 10^{-10}$  cm<sup>3</sup> molecules<sup>-1</sup> s<sup>-1</sup>. The simulations are summarized in Table S1.  
176 Table S2 shows the reaction rate constants for each reaction used in the simulation.

177 Each simulation showed that I<sub>2</sub> formation was negligible for the conditions used in calibration. In  
178 the presence of 1 ppmv NO, the simulations indicated that more than 99.9% of the I is rapidly converted  
179 to INO, leaving the INO self-reaction (Reaction RS14) as the only viable route to I<sub>2</sub> formation. The rate  
180 constant for this reaction is  $1.3 \times 10^{-14}$  cm<sup>3</sup> molecules<sup>-1</sup> s<sup>-1</sup> (Atkinson et al., 2007) – 30 times slower than  
181 the effective 2<sup>nd</sup>-order rate constant for the direct recombination of atomic I (Reaction RS9). In addition,  
182 the simulation was repeated including the reaction of I with INO to form I<sub>2</sub> and NO, with no significant  
183 change to the results. We conclude that I<sub>2</sub> formation is negligible under the conditions of our calibrations,  
184 in agreement with our laboratory tests.

### 185 ***S2.3. Calibration Comparison***

186 Figure S8 compares the CH<sub>3</sub>I (blue circles) and H<sub>2</sub>O photolysis (red, filled triangles) calibration  
187 methods from the SAFS campaign. Both methods agree within uncertainty. Variability in the F values  
188 likely results from variations in mercury lamp intensity, which during the campaign was only measured



189 when the ozone mixing ratio was quantified (via the change in  $[\text{NO}_2]$ ) when the lamp was turned off. We  
190 use the  $\text{CH}_3\text{I}$  derived curve in this analysis because  $\text{H}_2\text{O}$  photolysis calibrations were all conducted at RH  
191 less than  $\sim 20\%$ . Because increasing the RH also increases the  $\text{HO}_2$  concentration in the  $\text{H}_2\text{O}$  photolysis  
192 calibration method, the UV lamp output must be attenuated to prevent super-ambient radical  
193 concentrations. During SAFS, a remote method of light attenuation was unavailable, and because the  
194 instrument inlet box was inaccessible without interrupting sampling for other instruments, we could not  
195 alter the  $\text{H}_2\text{O}$  photolysis setup. For RH greater than 20%, it was found that the resultant  $\text{HO}_2$   
196 concentration was unreasonably high (sometimes exceeding 1 ppbv), and we therefore limit results to  
197 below this value. To demonstrate that the  $\text{H}_2\text{O}$  photolysis calibration method is applicable over a wider  
198 range of RH, we show results from a subsequent field deployment in Bloomington, IN during July 2017  
199 (Fig. S8, red, open triangles). While we would expect differences in the calibration results because the  
200 instrument configuration was different for this later deployment, the overall relationship between F and  
201 RH is similar at higher RH values.

### 202 *S3. Isoprene*

203  
204 No isoprene standard was available during SAFS for online calibration of the GC-MS  
205 observations, so an isoprene sensitivity was not determined during the campaign. Approximately 6-  
206 months after SAFS, a calibration of the same instrument was conducted during a second campaign using a  
207 multi-component mixture, including isoprene and 6 other hydrocarbons (iso-pentane, *n*-pentane, *n*-  
208 hexane, methylcyclopentane, cyclohexane, and benzene) measured during SAFS. To determine a  
209 sensitivity for isoprene for SAFS, the sensitivities for the six hydrocarbons during SAFS was compared to  
210 that for the second campaign, in which the GC setup differed in both sample trap temperature and detector  
211 micro channel plate voltage from the SAFS configuration. The mean ratio of sensitivities from SAFS to  
212 the second campaign for the six overlapping hydrocarbons was  $0.34 \pm 0.10$  ( $1\sigma$ ), while the slope of a  
213 regression line of the SAFS sensitivities to the second campaign sensitivities was 0.38. The isoprene  
214 sensitivity for SAFS was then determined by dividing the sensitivity to isoprene at the second campaign

215 by the average of these two values (0.36). The total uncertainty ( $1\sigma$ ) in the isoprene observations is  
216 estimated as 31%, with the sensitivity uncertainty dominating.

217 While there was an in-field calibration for the PTR derived isoprene, it was determined that the  
218 isoprene concentration in this older calibration tank was most likely lower than the stated value, biasing  
219 the PTR results. There were overlapping observations of the PTR and GC derived isoprene values from  
220 the start of the campaign to 19 May, after which the GC trap was damaged. So that we have calibrated  
221 isoprene observations for the duration of the campaign, we have scaled the PTR derived isoprene to GC  
222 values for this overlapping period. The 1-minute averaged PTR data were averaged to the GC sampling  
223 time, and a linear least squares regression was used to determine the relationship. This resulted in a fit  
224 with an  $r^2$  of 0.91 and a relationship between the two instruments as follows:  $[C_5H_8]_{GC} = 0.787[C_5H_8]_{PTR} -$   
225  $0.15$  (Fig. S9). The normalized mean bias for this relationship was 7%.

226 To evaluate the scaled PTR isoprene, we compare these values to isoprene measurements made  
227 hourly by a GC at the Floresville TCEQ site. The scaled PTR isoprene was averaged to the TCEQ  
228 sampling frequency and regressed against the TCEQ isoprene. This yielded a slope of 0.93 with an  $r^2$  of  
229 0.88. There was an offset of 0.10 ppbv between the two data sets with the TCEQ isoprene higher. The  
230 excellent agreement between the scaled PTR isoprene and the TCEQ isoprene further validates the  
231 isoprene results presented here.

#### 232 ***S4. Model Description***

233 To calculate the  $L_N/Q$  parameter from Sect. 3.2 of the main text, we modeled the photochemistry  
234 with the Framework for 0-D Atmospheric Modeling (F0AM) version 3.1 box model (Wolfe et al., 2016).  
235 The model was run with a subset of the Master Chemical Mechanism (Jenkin et al., 2003;Saunders et al.,  
236 2003) version 3.3.1 (MCMv331) (Jenkin et al., 2015). F0AM was constrained with observations taken  
237 during SAFS of temperature, pressure, water vapor,  $O_3$ ,  $NO_2$ ,  $CO$ ,  $CH_4$ ,  $HCHO$ , methanol, acetone,  
238 acetaldehyde, isoprene, propane, ethane, ethyne, monoterpenes, toluene, *n*-pentane, *n*-hexane, *n*-heptane,  
239 *n*-octane, xylenes, ethyl benzene, 1,2,4-trimethylbenzene, benzene, and cyclohexane. Because there were

240 no speciated observations, all monoterpenes were assumed to be  $\alpha$ -pinene. Likewise, observations of  
241 total *m*- and *p*-xylene were assumed to be a 50% mixture. Observational constraints were averaged over  
242 the 2-minute ECHAMP sampling interval, and only intervals with simultaneous observations of XO<sub>2</sub>, CO,  
243 O<sub>3</sub>, NO, water vapor, isoprene, and HCHO were used. Data from the GC, which had a sampling  
244 frequency lower than that of ECHAMP, were linearly interpolated to the ECHAMP sampling time. The  
245 modeled intervals were further restricted to sampling at a solar zenith angle (SZA) less than 80°. Missing  
246 data were linearly interpolated in time. For photolysis reactions, the model was constrained to  
247 observations of J<sub>NO<sub>2</sub></sub>. Other photolysis rates were determined from a lookup table of values calculated by  
248 the TUV model as described in Wolfe et al. (2016). These values were then scaled to the observed J<sub>NO<sub>2</sub></sub>.  
249 The model was run forward in time with a model time-step of 1 hour, with all constrained concentrations  
250 and meteorology held constant but photolysis frequencies varying with time of day. The diurnal cycle  
251 was repeated for 4 days for each set of observations, which was found sufficient to bring XO<sub>2</sub> into steady  
252 state.

253  
254

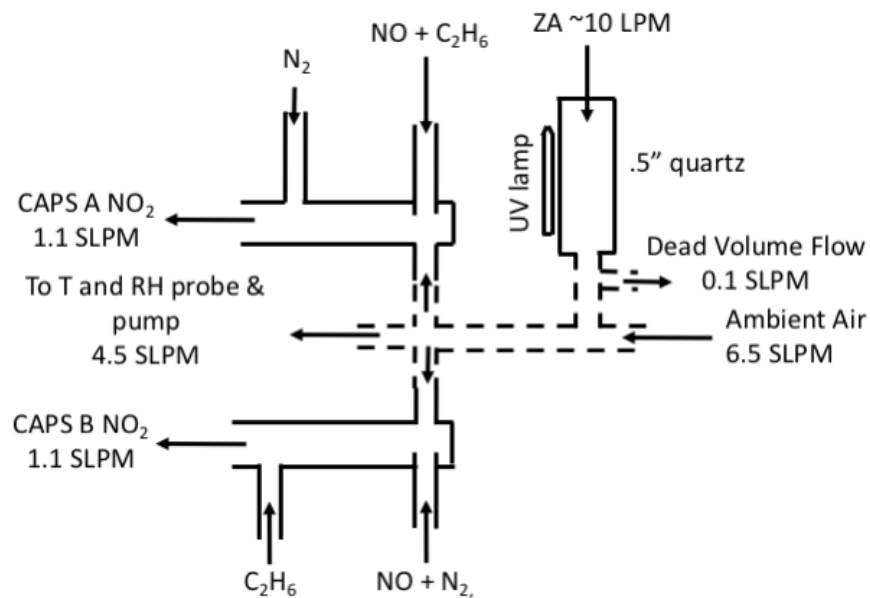

255  
256 **Figure S1:** A schematic of the ECHAMP inlet used during SAFS. Dashed lines represent glass coated in  
257 halocarbon wax. The ZA flow is only used during H<sub>2</sub>O based calibrations. As drawn, the upper reaction  
258 chamber (Chamber A) is in amplification mode (C<sub>2</sub>H<sub>6</sub> added upstream, N<sub>2</sub> added downstream) and the  
259 lower reaction chamber (Chamber B) is in background mode. Every minute, the C<sub>2</sub>H<sub>6</sub> and N<sub>2</sub> flows are  
260 switched so that the reaction chamber that was in amplification mode is then in background mode and  
261 vice versa. The upstream and downstream additions are ~15.2 cm apart, and the reaction chamber  
262 continues for another 66 cm before entering a filter. C<sub>2</sub>H<sub>6</sub> was a 42.2% in N<sub>2</sub> mixture and was flowed at  
263 35 sccm; NO was a 39.2 ppmv in N<sub>2</sub> mixture and was flowed at 25 sccm. The N<sub>2</sub> flow rate was 35 sccm.

264  
265

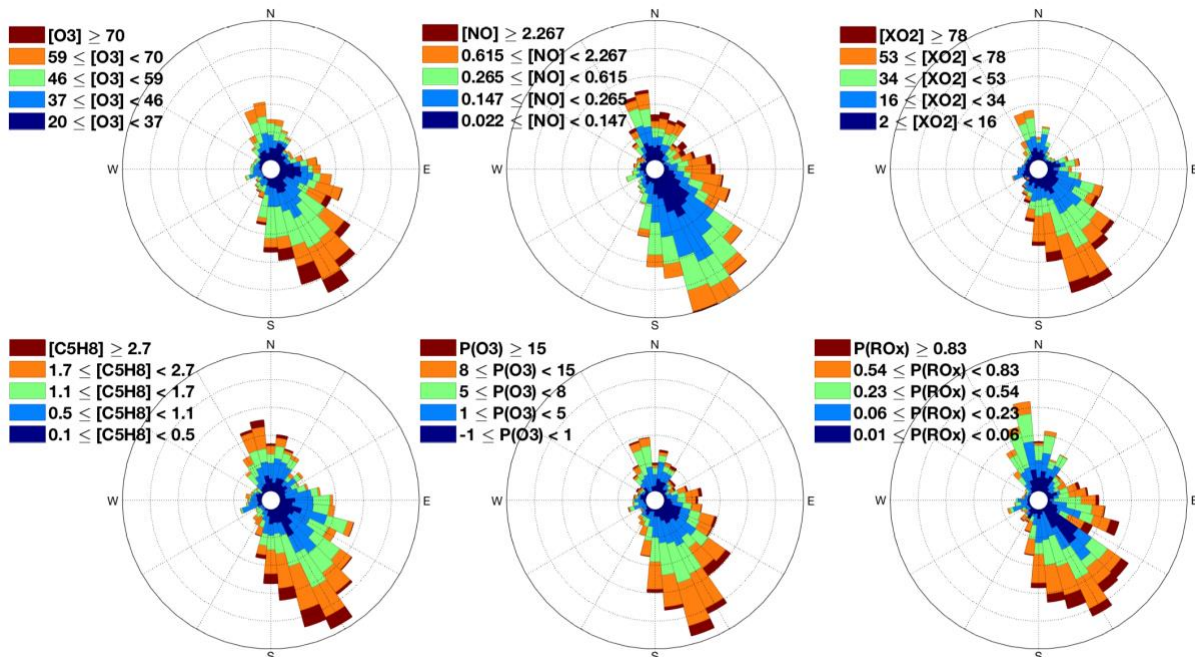

266  
 267 **Figure S2:** Wind roses showing the variation in O<sub>3</sub> (a), NO (b), XO<sub>2</sub> (c), isoprene (d), P(O<sub>3</sub>) (e), and  
 268 P(RO<sub>x</sub>) (f) with direction for all observations at the UTSA site. Observations are separated into their 5<sup>th</sup>,  
 269 25<sup>th</sup>, 50<sup>th</sup>, 75<sup>th</sup>, and 95<sup>th</sup> percentiles for each species.

270  
 271

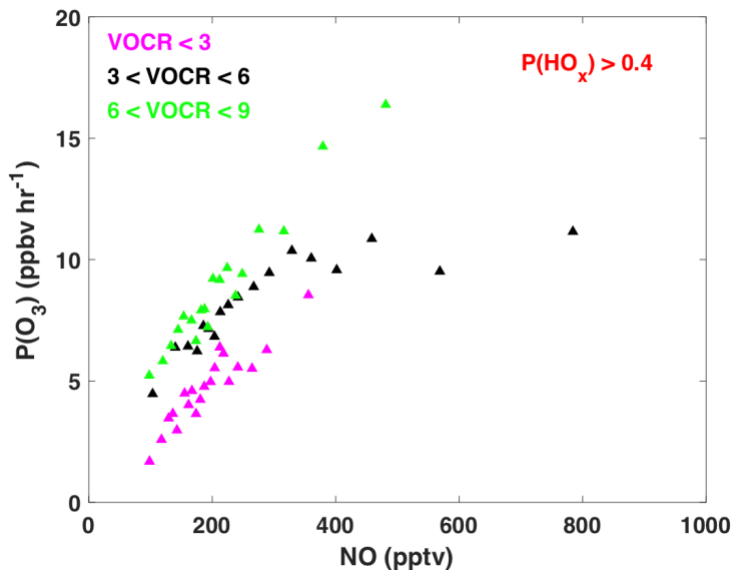

272  
 273  
 274 **Figure S3:** Same as Figure 6c except for P(HO<sub>x</sub>) > 0.4 pptv/s. The subset of observations with P(RO<sub>x</sub>) >  
 275 0.4 pptv s<sup>-1</sup> are separated into three categories: low VOC reactivity (VOCR < 3 s<sup>-1</sup>; magenta), medium  
 276 VOC reactivity (3 < VOCR < 6 s<sup>-1</sup>; black), and high VOC reactivity (6 < VOCR < 9 s<sup>-1</sup>; green). As in  
 277 Figure 6b, data are separated into NO bins with equal numbers of observations in each bin.

278

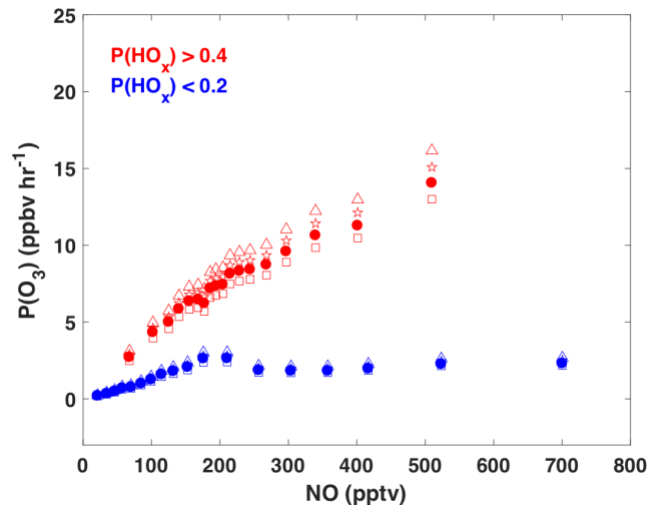

279  
 280 **Figure S4:** The variation of  $P(O_3)$  with NO for all daytime observations (07:00 to 20:00) made during  
 281 SAFS. Observations with  $P(RO_x) > 0.4$  pptv  $s^{-1}$  are shown in red, and observations with  $P(RO_x) < 0.2$   
 282 pptv  $s^{-1}$  are shown in blue.  $P(O_3)$  for the filled points was calculated using  $k_{NO+HO_2}$  as  $k_{eff}$ . This is the  
 283 same as the data in Fig. 6b. Open markers show  $P(O_3)$  calculated with different values for  $k_{eff}$ :  $k_{NO+CH_3O_2}$   
 284 (squares),  $k_{NO+Isoprene\ RO_2}$  (stars), and  $0.1*k_{NO+Acetyl\ Peroxy}+0.9*k_{NO+HO_2}$  (triangles).

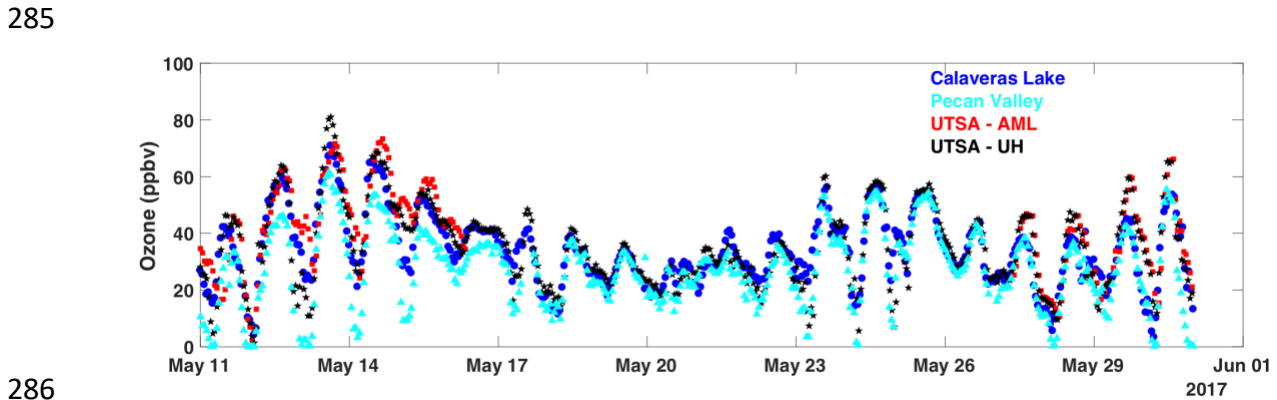

286  
 287 **Figure S5:** One-hour average  $O_3$  at the Calaveras (blue) and Pecan Valley (cyan) TCEQ monitoring sites  
 288 and at the UTSA SAFS site, including observations from both the AML (red) and by the University of  
 289 Houston (black).

290

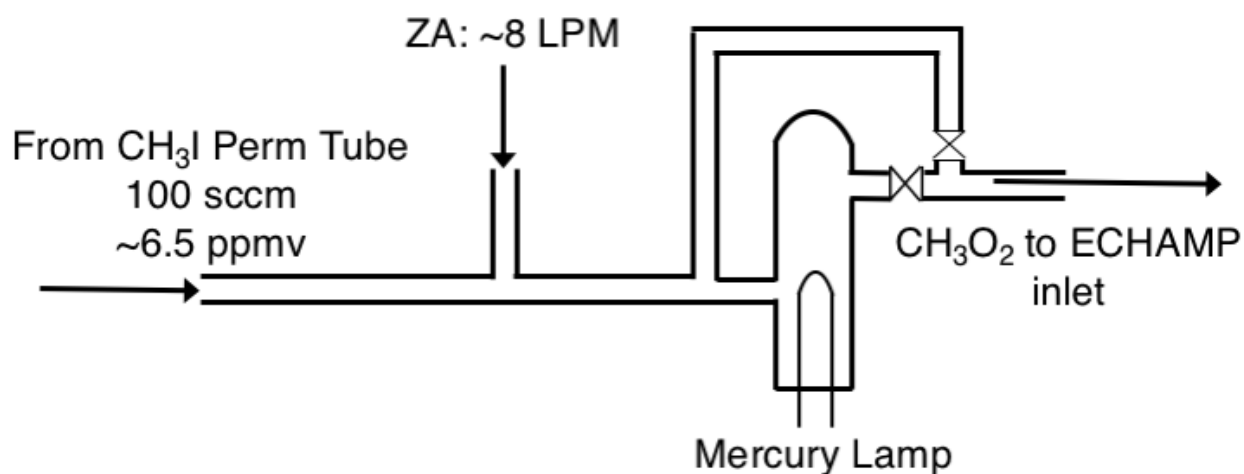

291  
 292 **Figure S6:** A schematic of the CH<sub>3</sub>I calibration setup. Hourglass shapes represent two-way valves. The  
 293 ZA is humidified over a range of RH values from 0% to 71%.

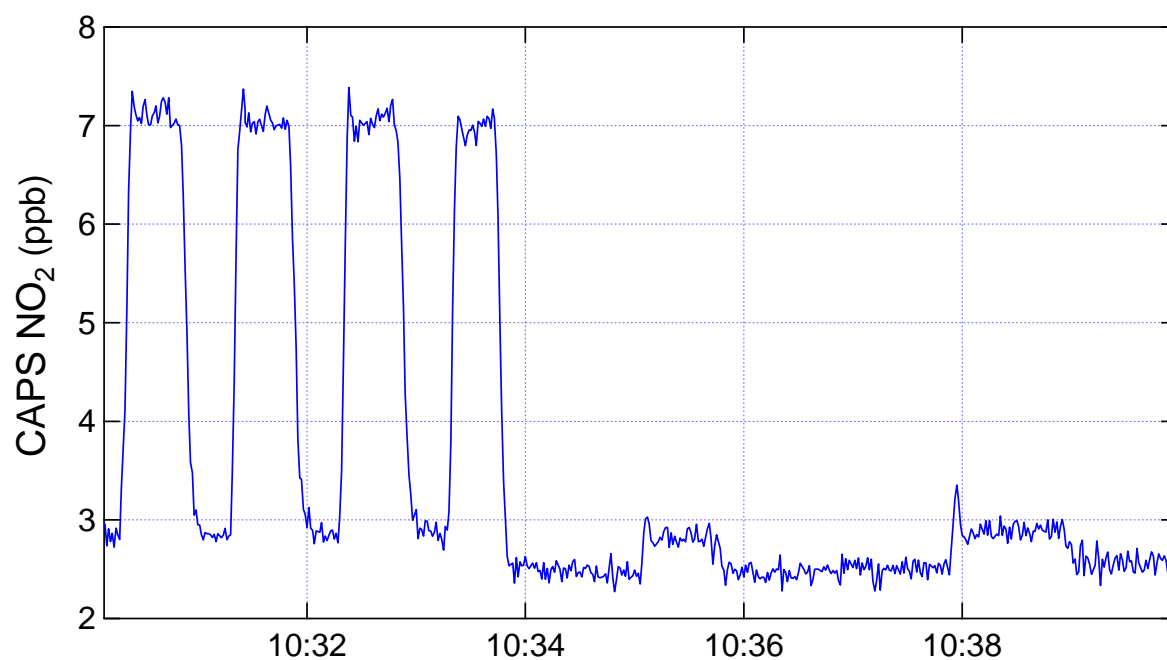

294  
 295 **Figure S7:** An example time series of CH<sub>3</sub>I calibration data from 31 May 2017. From 10:30 to 10:34  
 296 ECHAMP operated in regular amplification mode. From 10:34 to 10:40 ECHAMP was in background  
 297 mode (no amplification) and the CH<sub>3</sub>O<sub>2</sub> source was modulated on and off.

298

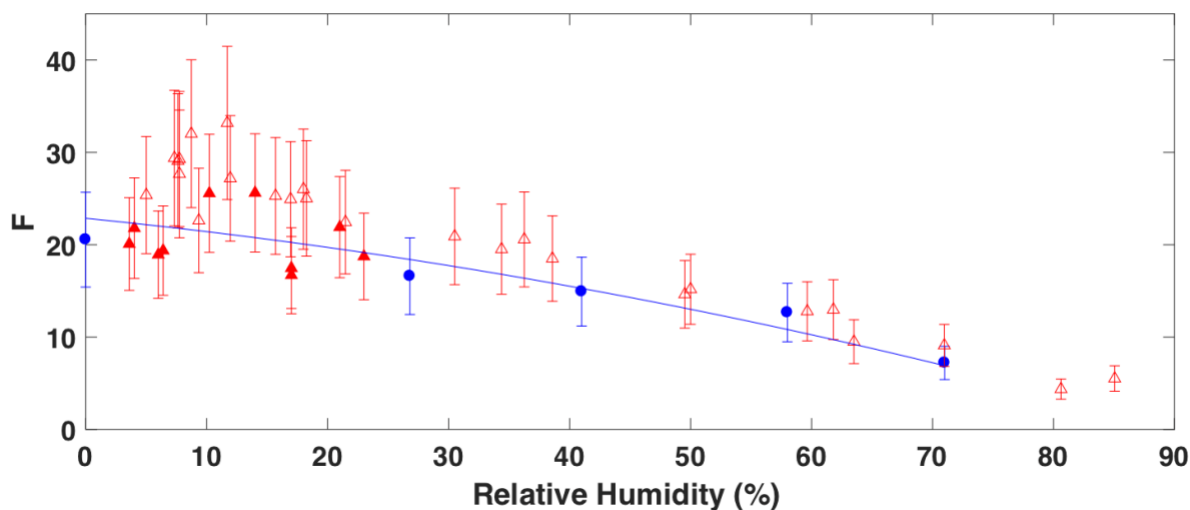

299  
 300  
 301 **Figure S8:** Calibration curve for ECHAMP during SAFS. The results from the CH<sub>3</sub>I (blue circles) H<sub>2</sub>O  
 302 photolysis (red, filled triangles) are both shown. In addition, results from an H<sub>2</sub>O photolysis calibration  
 303 conducted during a subsequent field deployment are also shown (red, open triangles). Indicated  
 304 uncertainties are the ECHAMP measurement uncertainty of 25% (2σ).

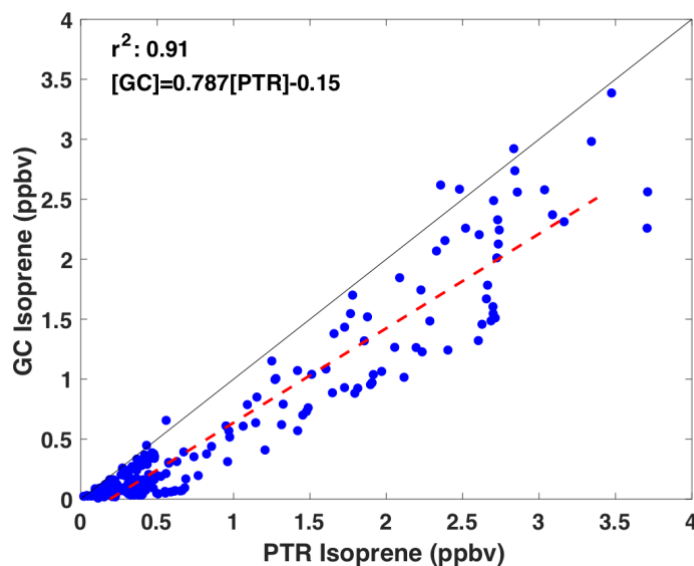

305  
 306  
 307 **Figure S9:** Comparison of isoprene measured by the PTR to observations from the GC. The isoprene  
 308 sensitivity of the GC was determined several months after the campaign as described in the text.  
 309  
 310

311 **Table S1:** Description of the different simulations used to calculate the variation in INO, I<sub>2</sub>, and CH<sub>3</sub>O<sub>2</sub>I  
 312 with time in the CH<sub>3</sub>I calibration setup.  $k_{\text{CH}_3\text{O}_2+\text{I}+\text{M}}$  is the rate constant for the forward reaction of reaction  
 313 S12.  
 314

|                                                                                             | Simulation 1          | Simulation 2          | Simulation 3          | Simulation 4          |
|---------------------------------------------------------------------------------------------|-----------------------|-----------------------|-----------------------|-----------------------|
| $[\text{I}]_0 = [\text{CH}_3\text{O}_2]_0$ (pptv)                                           | 100                   | 1000                  | 100                   | 1000                  |
| $k_{\text{CH}_3\text{O}_2+\text{I}+\text{M}}$ (molecules cm <sup>-3</sup> s <sup>-1</sup> ) | $1.0 \times 10^{-11}$ | $1.0 \times 10^{-11}$ | $1.0 \times 10^{-10}$ | $1.0 \times 10^{-10}$ |



315  
316  
317 **Table S2:** Rate constants at 298 K and sources for the iodine simulations. The reaction rate for Reaction  
318 S12 forward was varied as described in the text and Table S1.

| Reaction                                                                                               | $k_i$ (cm <sup>3</sup><br>molecules <sup>-1</sup> s <sup>-1</sup> ) | Source                 |
|--------------------------------------------------------------------------------------------------------|---------------------------------------------------------------------|------------------------|
| I + I → I <sub>2</sub> (Reaction RS9)                                                                  | $3.92 \times 10^{-13}$                                              | Jenkin et al. (1990)   |
| I + NO + M → INO + M (Reaction RS10)                                                                   | $1.7 \times 10^{-11}$                                               | Atkinson et al. (2007) |
| INO + INO → I <sub>2</sub> + 2NO (Reaction RS11)                                                       | $1.3 \times 10^{-14}$                                               | Atkinson et al. (2007) |
| CH <sub>3</sub> O <sub>2</sub> + I + M → CH <sub>3</sub> O <sub>2</sub> I + M (Reaction RS12 forward)  | $1.0 \times 10^{-11}$                                               | Estimate               |
| CH <sub>3</sub> O <sub>2</sub> I + M → CH <sub>3</sub> O <sub>2</sub> + I + M (Reaction RS12 reverse)  | 0                                                                   | Estimate               |
| CH <sub>3</sub> O <sub>2</sub> I + I → I <sub>2</sub> + CH <sub>3</sub> O <sub>2</sub> (Reaction RS13) | $1.0 \times 10^{-11}$                                               | Estimate               |
| CH <sub>3</sub> O <sub>2</sub> + NO → NO <sub>2</sub> + CH <sub>3</sub> O                              | $7.7 \times 10^{-12}$                                               | Sanders et al. (2011)  |

319  
320  
321  
322  
323  
324  
325  
326 **S5. References**  
327  
328 Anderson, D.C, Pavelec, J., Lindsay, A., Wood, E.C.: Wall Loss Rates and the Use of Nafion  
329 Tubing for Selective Measurement of Peroxy Radicals. In preparation.

330 Atkinson, R., Baulch, D. L., Cox, R. A., Crowley, J. N., Hampson, R. F., Hynes, R. G., Jenkin,  
331 M. E., Rossi, M. J., Troe, J., and Subcommittee, I.: Evaluated kinetic and photochemical data for  
332 atmospheric chemistry: Volume II; gas phase reactions of organic species, Atmos. Chem. Phys.,  
333 6, 3625-4055, 10.5194/acp-6-3625-2006, 2006.

334 Atkinson, R., Baulch, D. L., Cox, R. A., Crowley, J. N., Hampson, R. F., Hynes, R. G., Jenkin,  
335 M. E., Rossi, M. J., and Troe, J.: Evaluated kinetic and photochemical data for atmospheric  
336 chemistry: Volume III - gas phase reactions of inorganic halogens, Atmospheric Chemistry and  
337 Physics, 7, 981-1191, 10.5194/acp-7-981-2007, 2007.

338 Cantrell, C. A., Zimmer, A., and Tyndall, G. S.: Absorption cross sections for water vapor from  
339 183 to 193 nm, Geophysical Research Letters, 24, 2195-2198, 10.1029/97gl02100, 1997.

340 Clemitshaw, K. C., Carpenter, L. J., Penkett, S. A., and Jenkin, M. E.: A calibrated peroxy  
341 radical chemical amplifier for ground-based tropospheric measurements, J. Geophys. Res., 102,  
342 25405, 10.1029/97jd01902, 1997.

343 Creasey, D. J., Heard, D. E., and Lee, J. D.: Absorption cross-section measurements of water  
344 vapour and oxygen at 185 nm. Implications for the calibration of field instruments to measure  
345 OH, HO<sub>2</sub> and RO<sub>2</sub> radicals, Geophysical Research Letters, 27, 1651-1654,  
346 10.1029/1999gl011014, 2000.

347 Jenkin, M. E., Cox, R. A., Mellouki, A., Lebras, G., and Poulet, G.: Kinetics of the Reaction of  
348 Iodine Atoms with HO<sub>2</sub> Radicals, *Journal of Physical Chemistry*, 94, 2927-2934,  
349 10.1021/j100370a036, 1990.

350 Jenkin, M. E., Saunders, S. M., Wagner, V., and Pilling, M. J.: Protocol for the development of  
351 the Master Chemical Mechanism, MCM v3 (Part B): tropospheric degradation of aromatic  
352 volatile organic compounds, *Atmospheric Chemistry and Physics*, 3, 181-193, 2003.

353 Jenkin, M. E., Young, J. C., and Rickard, A. R.: The MCM v3.3.1 degradation scheme for  
354 isoprene, *Atmospheric Chemistry and Physics*, 15, 11433-11459, 10.5194/acp-15-11433-2015,  
355 2015.

356 Lanzendorf, E. J., Hanisco, T. F., Donahue, N. M., and Wennberg, P. O.: The measurement of  
357 tropospheric OH radicals by laser-induced fluorescence spectroscopy during the POPCORN field  
358 campaign and Intercomparison of tropospheric OH radical measurements by multiple folded  
359 long-path laser absorption and laser induced fluorescence - Comment, *Geophysical Research*  
360 *Letters*, 24, 3037-3038, 10.1029/97gl02899, 1997.

361 Sanders, S. P., Friedl, R. R., Abbatt, J. P. D., Barker, J. R., Burkholder, J. B., Golden, D. M.,  
362 Kolb, C. E., Kurylo, M. J., Moortgat, G. K., Wine, P. H., R.E., H., and Orkin, V. L.: *Chemical*  
363 *Kinetics and Photochemical Data for Use in Atmospheric Studies*, 2011.

364 Saunders, S. M., Jenkin, M. E., Derwent, R. G., and Pilling, M. J.: Protocol for the development  
365 of the Master Chemical Mechanism, MCM v3 (Part A): tropospheric degradation of non-  
366 aromatic volatile organic compounds, *Atmospheric Chemistry and Physics*, 3, 161-180, 2003.

367 Schultz, M., Heitlinger, M., Mihelcic, D., and Volzthomas, A.: Calibration Source for Peroxy-  
368 Radicals with Built-in Actinometry using H<sub>2</sub>O and O<sub>2</sub> photolysis at 185 nm, *Journal of*  
369 *Geophysical Research-Atmospheres*, 100, 18811-18816, 10.1029/95jd01642, 1995.

370 Wolfe, G. M., Marvin, M. R., Roberts, S. J., Travis, K. R., and Liao, J.: The Framework for 0-D  
371 Atmospheric Modeling (F0AM) v3.1, *Geosci. Model Dev.*, 9, 3309-3319, 10.5194/gmd-9-3309-  
372 2016, 2016.

373 Wood, E. C., and Charest, J. R.: Chemical Amplification - Cavity Attenuated Phase Shift  
374 Spectroscopy Measurements of Atmospheric Peroxy Radicals, *Analytical Chemistry*, 86, 10266-  
375 10273, 10.1021/ac502451m, 2014.

376 Wood, E. C., Deming, B. L., and Kundu, S.: Ethane-Based Chemical Amplification  
377 Measurement Technique for Atmospheric Peroxy Radicals, *Environmental Science &*  
378 *Technology Letters*, 4, 15-19, 10.1021/acs.estlett.6b00438, 2017.  
379
